# Supplementary material
Source: HighWire-hosted journal article supplement (https://ez-admanager.com/highwire/filestream/136137/field_highwire_adjunct_files/0/Mousavi_85_2159.pdf)
Supplement: Mousavi_85_2159.pdf [file Mousavi_85_2159.pdf]

理学改变。这些包括 p.Glu643del 突变在内的 LOF 突变可致血液和大脑中缺乏特定的转录产物或蛋白质。

**结论：**这项比利时临床患者队列研究发现 *TBK-1* LOF 突变是引起临床 FTD 的第三大常见原因，仅次于 *C9orf72* 和 *GRN*，同时也是继 *C9orf72* 之后引起临床 ALS 的第二大常见原因。这些发现说明 FTD 和 ALS 属于同一疾病谱系。*Neurology*® 2016;85:2116–2125

## 2型肌强直性营养不良症影响患者生活质量 (PRISM-2)

Chad Heatwole, MD,MSCI;Nicholas Johnson, MD;Rita Bode, PhD;Jeanne Dekdebrun, MS;  
Nuran Dilek, MS;James E. Hilbert, MS;Elizabeth Luebbe, MS;William Martens, BA;Michael P. McDermott, PhD;  
Christine Quinn, MS;Nan Rothrock, PhD;Charles Thornton, MD;Barbara G. Vickrey, MD,MPH;  
David Victorson, PhD;Richard T. Moxley III, MD

**目的：**旨在研究 2 型肌强直性营养不良症 (myotonic dystrophy type 2, DM2) 对患者生活造成最严重不良影响的症状的发作频次和相对重要性，鉴别与 DM2 症状相关性最强的因素。

**方法：**通过横断面研究纳入在全国 DM2 患者注册中心登记的 DM2 成年患者，评估 DM2 的 310 个症状和 21 个症状类别在 DM2 患者中出现的频次和相对重要性。所有分析数据包括患者年龄、性别、受教育程度、就业状况和症状的持续时间。

**结果：**DM2 中最常见的症状是活动能力丧失 (94.4%)、移动或行走能力受限 (89.2%)、臀部/大腿或膝关节无力 (89.2%)、易疲劳 (89.2%) 和肌强直 (82.6%)。受试者认为活动能力丧失和易疲劳是 DM2 对患者生活造成不良影响的最主要的症状类别。更高的 DM2 症状发作的平均频次还与 DM2 患者的失业率增加、DM2 症状持续时间延长和较低的受教育程度具有相关性 ( $p < 0.01$ )。更高的 DM2 症状发作的平均影响与 DM2 患者的失业率增加、DM2 症状持续时间延长、性别和年龄增加具有相关性 ( $p < 0.01$ )。

**结论：**DM2 患者的生活被多种症状影响。DM2 的这些症状在 DM2 患者中和不同的 DM2 亚群患者中具有不同水平的显著性和发作频次。*Neurology*® 2015;85:2136–2146

## 早期放射手术为三叉神经痛患者提供良好的疼痛缓解作用

Seyed H. Mousavi, MD;Ajay Niranjani, MD;Marshall J. Huang, BS;Fahad J. Laghari, MD;Samuel S. Shin, MD, PhD;  
Josh L. Mindlin, BS;John C. Flickinger, MDL. Dade Lunsford, MD

**目的：**评估立体定向放射手术治疗 (stereotactic radiosurgery, SRS) 作为医学难治性三叉神经痛的首个外科治疗方案时影响其取得良好结果的相关因素。

**方法：**纳入 121 例 (中位年龄 72 岁) 患医学难治性疼痛且既往未接受过手术治疗的患者并接受伽马刀 SRS 作为三叉神经痛的初始手术方案。利用单一 4-mm 的等深点，对术中 MRI 定位的三叉神经靶点进行平均剂量最大为 80Gy 的照射。中位随访 36 个月。

**结果：**107 例 (88%) 患者在中位时间 1 个月时达到疼痛缓解 [Barrow 神经研究所 (BNI) 评分 I-IIIa]。患者早期行 SRS 治疗 (疼痛发作后 3 年内) 后至疼痛缓解的时间间隔更短 (1 周,  $p < 0.001$ )、疼痛缓解停药的时间间隔更长 (BNI-I,  $p < 0.001$ ) 及疼痛完全控制持续时间更长 (BNI-I-IIIa,  $p < 0.001$ )。三叉神经痛诊断后 1 年、2 年、3 年及  $\geq 3$  年接受 SRS 治疗的患者其中位无疼痛间期分别为 68 个月、37 个月、36 个月及 10 个月。SRS 治疗后首个 3 周内对 SRS 有应答的患者较应答时间长的患者

的完全疼痛缓解持续时间长( $p = 0.001$ )。15例(12%)患者在接受 SRS 治疗后出现新的感觉障碍。

**结论:** 与晚期 SRS 相比,早期 SRS 作为难治性三叉神经痛的初始手术治疗方案可取得更快、更好、更长的疼痛缓解效果。

**证据分级:** 本研究为医学难治性三叉神经痛患者提供了 IV 级证据,早期 SRS 作为初始手术方案可提供更快、更好、更长的疼痛缓解效果。 *Neurology*®2015;85:2159–2165

## 倾斜试验诱发血管迷走性晕厥与精神性假性晕厥 重叠的临床疾病

Helene Blad, MD;Robert Jan Lamberts,PhD;J. Gert van Dijk, PhD;Roland D. Thijs, PhD

**目的:** 旨在描述倾斜试验诱发血管迷走性晕厥 (vasovagal syncope, VVS) 与精神性假性晕厥 (psychogenic pseudosyncope,PPS)的合并症,并帮助其临床鉴别。

**方法:** 我们自 2 个三级晕厥转诊中心筛选出倾斜试验诱发 VVS/PPS 患者。针对每个病例,在相同中心随机选取 3 例倾斜试验诱发 VVS 作为对照。应用校正后的多重比较法对两组患者的临床特征进行对比。

**结果:** 在 1,164 次倾斜台试验中,有 23 例(2%)诱发了 VVS/PPS;将这 23 个病例与 69 个 VVS 病例进行比较。研究结果显示,VVS 与 PPS 同时发生的概率比预测的概率更高,分别为:2% vs 0.6%, $p < 0.001$ 。所有的 VVS / PPS 患者和对照组 VVS 患者都有典型的 VVS 前驱症状和诱因。VVS / PPS 患者的发作频率(2 次 / 月,范围 0.1~60)显著高于 VVS 对照组的患者(0.25 次 / 月,范围 0.02 ~ 4; $p < 0.001$ )。VVS/PPS 组意识恢复延迟频率更高 [似然比(likelihood ratio, +LR)8.14, 95% 可信区间(confidence interval, CI)3.94 ~ 16.84], 同样无前驱症状的发作(+LR 5.57, 95% CI 2.53 ~ 12.26)、非典型诱因(+LR 5.00, 95% CI 2.04~12.24)、闭目(+LR 3.75, 95% CI 1.68 ~ 8.35)、明显意识丧失 > 1 分钟(+LR 2.86, 95% CI 1.98 ~ 4.13)的频率均更高。

**结论:** VVS/PPS 具有复杂的表现类型。高频发作、意识恢复延迟、明显意识丧失 >1 分钟、发作性闭目、非典型诱因及无发作前驱症状可作为 PPS 与 VVS 共有的临床表现。 *Neurology*®2015;85:2006–2010

## ADCY5相关的运动障碍 疾病谱和基因型-表现型的相关性

Dong-Hui Chen, MD,PhD;Aurélie Méneret, MD;Jennifer R. Friedman, MD;Olena Korvatska, PhD;Alona Gad, MD;

Emily S. Bonkowski, BS;Holly A. Stessman, PhD;Diane Doummar, MD;Cyril Mignot, MD, PhD;

Mathieu Anheim, MD,PhD;Saunders Bernes, MD;Marie Y. Davis, MD, PhD;Nathalie Damon-Perrière,MD;

Bertrand Degos, MD, PhD;David Grabli, MD, PhD;Domitille Gras, MD;Fuki M. Hisama, MD;Katherine M. Mackenzie,MD;

Phillip D. Swanson, MD,PhD;Christine Tranchant,MD, PhD;Marie Vidailhet, MD;Steven Winesett, MD;

Oriane Trouillard Laura M. Amendola, MS;Michael O. Dorschner, PhD;Michael Weiss, MD;Evan E. Eichler, PhD;

Ali Torkamani, PhD;Emmanuel Roze,MD, PhD;Thomas D. Bird, MD;Wendy H. Raskind, MD,PhD

**目的:** 旨在研究腺苷酸环化酶 5(ADCY5)相关运动障碍的临床表现、特征及其基因型 - 表现型间的相关性。

**方法:** 通过外显子或靶序列测序,分析有舞蹈病样或肌张力障碍表现患者的 ADCY5。采用等位基因特定的扩增法对疑似嵌合体进行确认。评估 50 例新发和既往报道病例的临床特征。
